# Supplementary material for: Requirement of Cellular Protein CCT7 for the Replication of Fowl Adenovirus Serotype 4 (FAdV-4) in Leghorn Male Hepatocellular Cells Via Interaction with the Viral Hexon Protein
Source: MDPI journal article supplement (doi:10.3390/v11020107), 2019-01-27
Supplement: s1 [file s1]

## Supplementary Figure 1

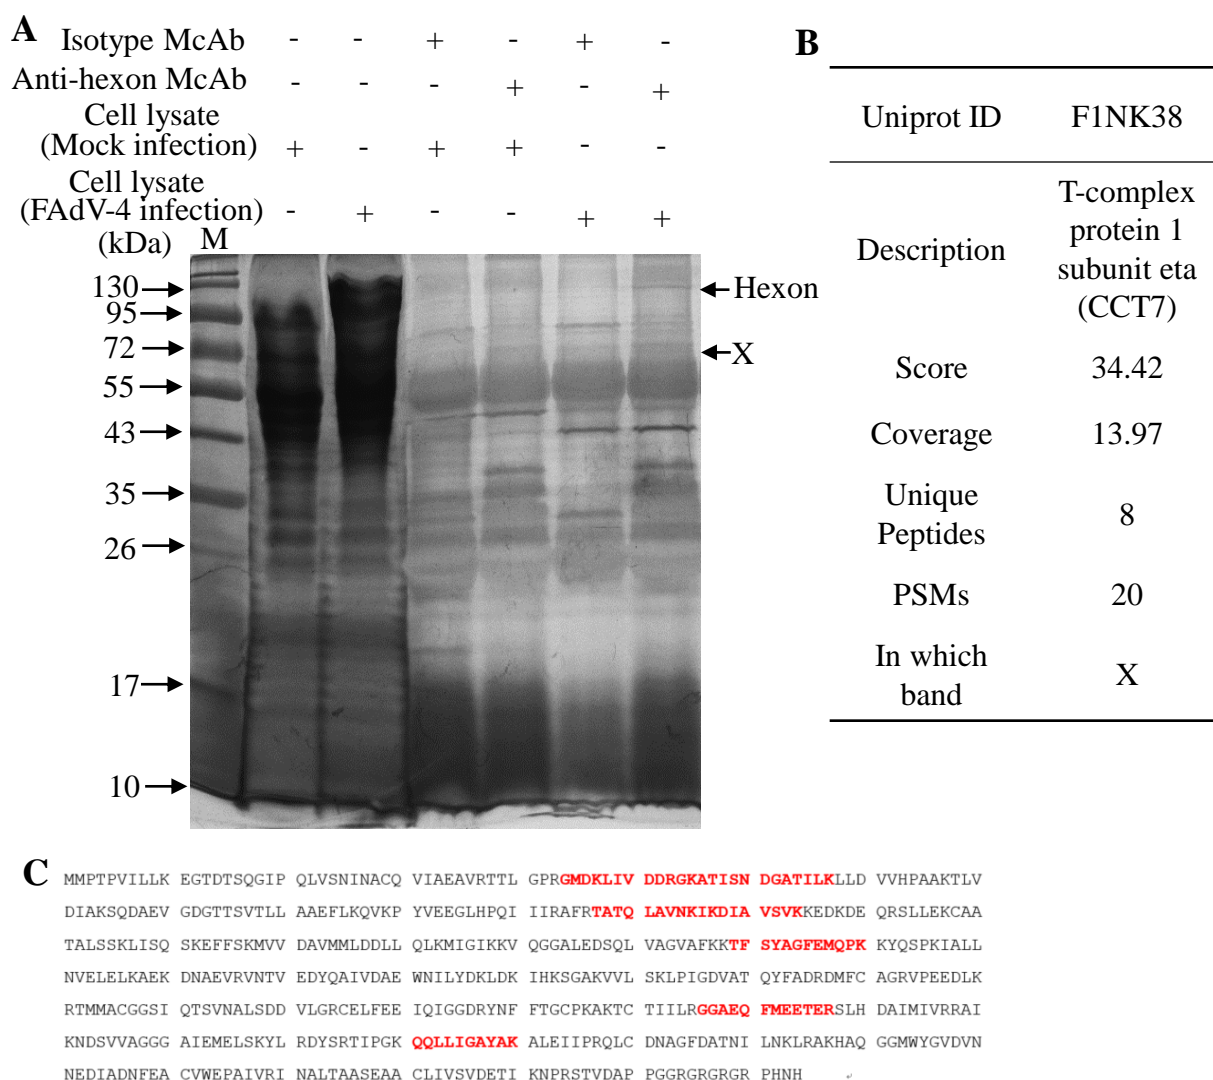

**Fig. S1.** Screening and identification of FAdV-4 hexon-interacting cellular proteins in FAdV-4-infected LMH cells. (A-C) LMH cells were mock infected or infected with FAdV-4, and subjected to a pull-down assay. The arrow pointed protein bands in (A) were further analyzed by liquid chromatography-mass spectrography (LC-MS) (B) and the cellular protein CCT7 was identified from the arrow-pointed protein band X in (A). The alignment of the chCCT7 sequences (UniProtKB: F1NK38) with its matched peptides is shown in bold red identified by LC-MS (C).

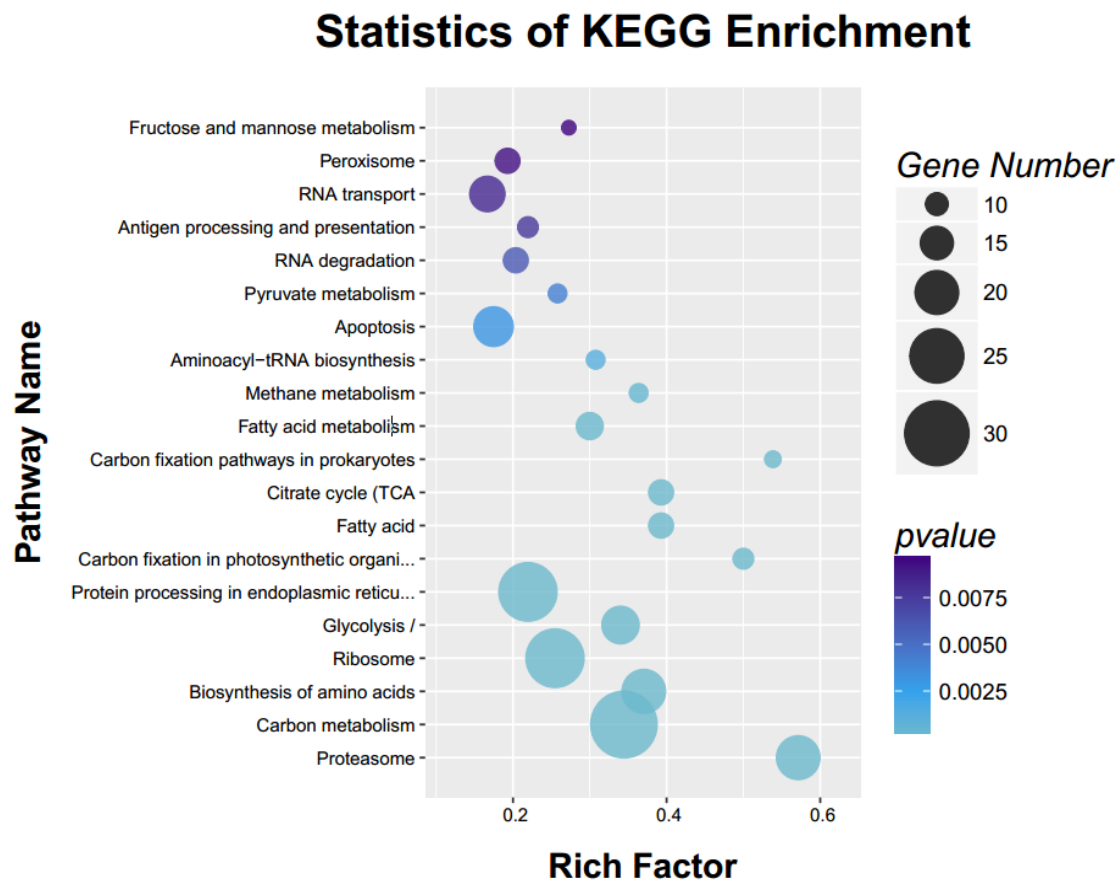

**Fig. S2.** KEGG (Kyoto Encyclopedia of Genes and Genomes) pathway enrichment analyses of the protein samples in Figure 2A shows the identified FAdV-4 hexon-binding protein candidates.
